# Supplementary material for: Three-Dimensional Odontometric Mapping of Maxillary Anterior Teeth Using CBCT in an Indian Cohort for Precision Endodontic Access cavity preparation: A primary investigation
Source: Research Square preprint supplement (doi:10.21203/rs.3.rs-6988842/v1), 2025-08-13
Supplement: Supplementary file 1 [file 1cc3ba25b4c1a4962334458b.xlsx]

## Sheet: Sheet1
	Age	Sex	Odontometric data of central incisors			Odontometric data of lateral incisor			Odontometric data of canine
S. No.			Dist. between central fossa to the pulp chamber(mm)	Dist. between incisal edge to the pulp chamber(mm)	Dist. Between central fossa to the cingulum(mm)	Dist. between central fossa to the pulp chamber(mm)	Dist. between incisal edge to the pulp chamber(mm)	Dist. Between central fossa to the cingulum(mm)	Dist. between central fossa to the pulp chamber(mm)	Dist. between incisal edge to the pulp chamber(mm)	Dist. Between central fossa to the cingulum(mm)
1	20	2	2.33	5.6	4.25	2.41	5.58	1.34	3.12	4.08	4.66		CODE
2	19	1	2.56	4.8	3.44	2	4.42	3.77	4.66	5.73	3.12		1 = Males
3	22	2	2.33	4.8	5.22	2.26	3.69	3.69	3.77	5.26	4.66		2 = Females
4	18	2	1.56	5	5.12	2.26	3.62	3.12	3.05	4.12	2.26
5	21	2	2.26	3.77	5.12	2	4.87	3.69	2.68	5.73	2
6	25	1	2.26	4.95	4.82	2.6	6.71	2	3.22	4.47	3.96
7	22	2	2.33	4.87	3.44	2.15	6.38	2.88	3.77	5.26	3.23
8	18	1	2.26	4.83	2.83	2	5.77	3.12	3.22	5.91	2.56
9	19	2	2.83	4.56	4.53	2	4.31	3.44	2.33	4.83	2.88
10	19	1	1.7	5.91	3.94	2.68	5.91	3.22	3.12	5.22	2.56
11	18	1	2.56	5.45	3.58	2.56	4	4.47	2	4.56	3.69
12	18	2	1.7	4.83	5.37	1.79	6.45	4.33	2.53	5.37	2.88
13	22	2	1.7	3.58	5.22	2.15	4.66	3.22	2.33	5.73	1.79
14	19	2	2.26	5.95	3.77	2.26	3.58	4.66	2.88	5.37	2.83
15	23	1	2.56	5.73	4.66	1.79	4.47	3.39	3.22	4.56	2.88
16	24	1	2.26	3.69	4.47	2.33	4.56	2.88	2.56	4.66	1.7
17	21	1	2.83	5.66	4.25	2.15	6.38	2.88	3.77	5.26	3.23
18	24	1	2.26	5.91	4.33	2.6	6.71	2	3.22	4.47	3.96
19	22	1	2.26	4.95	4.56	2.15	6.38	2.88	3.77	5.26	3.23
20	18	2	2.56	4.47	3.94	2	5.77	3.12	3.22	5.91	2.56
21	19	1	2	4.31	4.47	3.11	5.68	3.78	2.9	6.37	2.86
22	20	1	2.83	5.56	5.01	2.86	4.29	3.96	3.24	3.38	2.5
23	22	1	2.56	4.87	4.25	2.79	2.82	2.24	4.56	3.53	1.62
24	23	2	2	4.95	4.88	2.4	5.06	2.62	3.58	6.32	3.5
25	25	2	2	4.18	4.56	3.04	5.4	4.39	3.83	3.46	2.37
26	24	2	2	4.02	5.22	3.5	5.85	3.73	2.08	5.49	2.57
27	23	2	2	5.2	5.57	2.6	6.71	2	3.22	4.47	3.96
28	22	2	1.79	3.96	3.79	2.15	6.38	2.88	3.77	5.26	3.23
29	21	1	2.26	5.34	4.66	2	5.77	3.12	3.22	5.91	2.56
30	18	2	1.7	4.31	4.66	2.14	5.95	4.94	2.5	4.9	1.58
31	19	2	2.26	5.34	3.44	3.34	6.29	2.19	2.34	5.21	1.39
32	19	1	1.7	4.95	5.44	3.45	4.25	2.98	4.72	6.82	2.58
33	18	1	2	4.42	4.82	2.55	4.73	4.72	2.66	4.13	2.32
34	21	1	2.26	4.18	4.47	2.35	6.52	3.07	3.61	6.48	2.16
35	20	2	2.56	5.2	4.12	3.78	2.63	3.75	3.52	4.87	1.19
36	25	1	2	5.06	4.33	3.72	2.34	3.87	4.06	6.34	1.75
37	23	1	2.26	5.95	3.44	2.64	5.76	3.65	4.09	3.68	1.19
38	24	1	2.56	5.82	3.12	3.38	4.51	2.3	2.71	5.38	1.36
39	21	2	1.84	6.07	4.33	2.7	5.18	3.3	4.67	5.62	3.48
40	18	1	2.15	5.69	5.34	2.1	2.32	2.62	3.86	5.39	2.48
41	19	1	2.26	4.83	3.69	2.5	4.65	4.03	2.35	3.13	3.19
42	18	1	2.56	6.09	3.69	3.12	2.07	3.39	4.09	3.05	2.43
43	18	2	2.26	3.79	4.25	2.63	6.52	2.29	2.1	5.1	2.9
44	19	1	2.83	6.51	4.33	2.4	5.78	3.47	2.17	6.51	2.35
45	18	1	2.56	5.01	3.23	3.85	5.45	3.38	4.14	6.38	1.7
46	18	2	2.33	5.91	3.42	2.62	5.4	2.61	4.71	6.36	3.73
47	22	1	2.68	7	3.79	3.24	6.86	4.46	3.91	6.23	3.55
48	18	1	1.7	3.69	6.11	2.88	4.38	3.96	3.62	5.17	3.27
49	23	1	1.7	4.47	6	3.19	5.85	2.25	2.67	6.04	1.78
50	21	1	1.79	5.77	4.68	3.73	5.99	3.16	3.87	5.24	2.02
51	22	2	1.7	3.94	5.06	3.59	4.29	3.98	3.2	5.3	3.76
52	19	1	2.88	5.44	4.12	2.72	2.54	4.2	4.58	5.09	2.35
53	19	2	2.26	5.82	4.66	3.75	6.46	3.4	4.49	6.66	1.87
54	20	1	2	4.95	4.47	3.82	4.73	4.6	3.77	6.85	3.05
55	22	1	2.56	5.73	4.47	3.57	5.43	2.71	4.61	5.95	1.34
56	24	1	2.33	5.37	4.56	3.87	6.92	2.14	2.88	4.74	2.76
57	21	2	2	5.01	2.83	2.32	6.62	3.87	3.55	3.46	3.6
58	19	1	1.7	4.31	4.33	2.96	4.55	3.29	4.09	4.09	3.77
59	19	1	2	4.47	4	2.33	2.12	2.78	4.86	3.87	1.94
60	20	1	2.56	5.82	4.33	2.16	3.09	3.24	4.62	3.16	1.3
61	25	1	2.83	6.51	4.33	2.15	4.66	2.67	4.98	6.7	2.51
62	24	1	2.56	5.01	3.23	3.67	4.91	2.19	3.33	6.61	3.1
63	20	2	2.33	5.91	3.42	3.07	4.68	3.42	4.3	3.82	3.7
64	25	1	2.68	7	3.79	3.85	2.97	4.33	2.19	5.27	3.39
65	23	1	1.7	3.69	6.11	3.76	6.41	4.11	4.22	5.31	3.17
66	24	1	1.7	4.47	6	3.22	4.56	3.66	2.85	3.1	3.84
67	21	1	1.79	5.77	4.68	3.39	3.88	3.53	3.37	4.31	1.32
68	18	2	1.7	3.94	5.06	2.55	4.34	2.62	4.29	4.67	3.32
69	19	1	2.88	5.44	4.12	2.12	5.93	3.62	3.87	5.67	3.7
70	21	2	2.26	5.82	4.66	2.54	3.33	3.05	2.6	3.36	2.22
71	24	1	2	4.95	4.47	3.85	6.97	4.49	4.39	6.99	1.43
72	22	1	2.56	5.73	4.47	3.71	2.8	3.14	2.9	4.57	2.43
73	22	1	2.33	5.37	4.56	2.25	3.14	2.77	4.05	5.98	3.48
74	22	2	2	5.01	2.83	2.22	4.17	3.96	2.79	5.78	1.15
75	18	1	1.7	4.31	4.33	3.53	4.11	3.95	3.78	5.04	1.75
76	19	1	2	4.47	4	2.17	2.22	3.92	3.03	4.82	2.81
77	21	1	2.56	5.82	4.33	3.53	3.88	3.67	2.48	3.03	2.38
78	25	1	1.7	5.91	3.94	3.1	2.87	2.95	2.84	4.67	2.39
79	23	1	2.56	5.45	3.58	2.1	2.03	2.13	4.67	6.97	1.18
80	22	2	1.7	4.83	5.37	2.29	4.14	3.48	3.37	3.77	2.42
81	24	2	1.7	3.58	5.22	3.34	5.02	4.99	3.43	5.47	2.1
82	19	2	2.26	5.95	3.77	2.12	2.67	4.51	4.09	4.66	2.25
83	20	1	2.56	5.73	4.66	2.38	6.27	4.04	2.05	3.85	3.1
84	18	1	2.26	3.69	4.47	2	2.99	2.81	2.32	4.89	3.28
85	21	1	2.83	5.66	4.25	3.8	3.16	4.38	2.09	6.89	2.37
86	25	1	2.26	5.91	4.33	3.69	2.27	4.52	3.91	3.16	3.9
87	24	1	2.26	4.95	4.56	3.46	2.58	3.8	4.32	3.53	3.71
88	19	2	2.56	4.47	3.94	2.5	2.75	2.26	4.89	4.49	2.44
89	18	1	2	4.31	4.47	3.14	4	4.06	2.09	4.29	2.62
90	20	1	2.83	5.56	5.01	3.79	5.39	2	3.35	4.03	1.77
91	21	1	2.56	4.87	4.25	2.44	4.41	2.11	3.95	5.4	1.17
92	22	2	2	4.95	4.88	3.32	4.79	4.37	4.34	5.63	2.45
93	25	2	2	4.18	4.56	2.11	3.08	4.66	3.92	3.07	1.37
94	19	2	2	4.02	5.22	3.43	2.52	3.82	2.4	3.04	3.58
95	18	2	2	5.2	5.57	2.9	6.69	2.69	3.15	4.8	2.02
96	20	2	1.79	3.96	3.79	2.67	6.18	3.74	3.28	3.83	1.37
97	23	1	2.26	5.34	4.66	2.1	5.95	4.24	3.72	6.13	1.77
98	22	2	1.7	4.31	4.66	2.24	3.23	3.56	4.05	3.38	3.14
99	21	2	2.26	5.34	3.44	2.9	3.02	2.65	2.34	4.34	2.73
100	21	2	1.79	3.96	3.79	3.57	4.86	2.76	3.66	3.25	3.29
101	19	1	1.7	5.91	3.94	2.29	4.14	3.48	3.37	3.77	2.42
102	18	1	2.56	5.45	3.58	3.34	5.02	4.99	3.43	5.47	2.1
103	18	2	1.7	4.83	5.37	2.12	2.67	4.51	4.09	4.66	2.25
104	22	2	1.7	3.58	5.22	2.38	6.27	4.04	2.05	3.85	3.1
105	19	2	2.26	5.95	3.77	2	2.99	2.81	2.32	4.89	3.28
106	23	1	2.56	5.73	4.66	3.8	3.16	4.38	2.09	6.89	2.37
107	24	1	2.26	3.69	4.47	3.69	2.27	4.52	3.91	3.16	3.9
108	21	1	2.83	5.66	4.25	3.46	2.58	3.8	4.32	3.53	3.71
109	24	1	2.26	5.91	4.33	2.5	2.75	2.26	4.89	4.49	2.44
110	22	1	2.26	4.95	4.56	3.14	4	4.06	2.09	4.29	2.62
111	18	2	2.56	4.47	3.94	3.79	5.39	2	3.35	4.03	1.77
112	19	1	2	4.31	4.47	2.44	4.41	2.11	3.95	5.4	1.17
113	20	1	2.83	5.56	5.01	3.32	4.79	4.37	4.34	5.63	2.45
114	22	1	2.56	4.87	4.25	2.64	5.76	3.65	4.09	3.68	1.19
115	23	2	2	4.95	4.88	3.38	4.51	2.3	2.71	5.38	1.36
116	25	2	2	4.18	4.56	2.7	5.18	3.3	4.67	5.62	3.48
117	24	2	2	4.02	5.22	2.1	2.32	2.62	3.86	5.39	2.48
118	23	2	2	5.2	5.57	2.5	4.65	4.03	2.35	3.13	3.19
119	22	2	1.79	3.96	3.79	3.12	2.07	3.39	4.09	3.05	2.43
120	19	1	2.88	5.44	4.12	2.63	6.52	2.29	2.1	5.1	2.9
121	19	2	2.26	5.82	4.66	2.4	5.78	3.47	2.17	6.51	2.35
122	20	1	2	4.95	4.47	3.85	5.45	3.38	4.14	6.38	1.7
123	22	1	2.56	5.73	4.47	2.62	5.4	2.61	4.71	6.36	3.73
124	24	1	2.33	5.37	4.56	3.24	6.86	4.46	3.91	6.23	3.55
125	21	2	2	5.01	2.83	2.88	4.38	3.96	3.62	5.17	3.27
126	19	1	1.7	4.31	4.33	3.19	5.85	2.25	2.67	6.04	1.78
127	19	1	2	4.47	4	3.73	5.99	3.16	3.87	5.24	2.02
128	20	1	2.56	5.82	4.33	3.59	4.29	3.98	3.2	5.3	3.76
129	25	1	2.83	6.51	4.33	2.64	5.76	3.65	4.09	3.68	1.19
130	24	1	2.56	5.01	3.23	3.38	4.51	2.3	2.71	5.38	1.36
131	20	2	2.33	5.91	3.42	2.7	5.18	3.3	4.67	5.62	3.48
132	25	1	2.68	7	3.79	2.1	2.32	2.62	3.86	5.39	2.48
133	23	1	1.7	3.69	6.11	2.5	4.65	4.03	2.35	3.13	3.19
134	24	1	1.7	4.47	6	3.12	2.07	3.39	4.09	3.05	2.43
135	21	1	1.79	5.77	4.68	2.63	6.52	2.29	2.1	5.1	2.9
136	18	2	1.7	3.94	5.06	2.4	5.78	3.47	2.17	6.51	2.35
137	19	1	2.88	5.44	4.12	3.85	5.45	3.38	4.14	6.38	1.7
138	21	2	2.26	5.82	4.66	3.11	5.68	3.78	2.9	6.37	2.86
139	24	1	2	4.95	4.47	2.86	4.29	3.96	3.24	3.38	2.5
140	22	1	2.56	5.73	4.47	2.79	2.82	2.24	4.56	3.53	1.62
141	22	1	2.33	5.37	4.56	2.4	5.06	2.62	3.58	6.32	3.5
142	22	2	2	5.01	2.83	3.04	5.4	4.39	3.83	3.46	2.37
143	18	1	1.7	4.31	4.33	3.5	5.85	3.73	2.08	5.49	2.57
144	19	1	2	4.47	4	1.79	4.47	4.25	2.33	5.44	3.44
145	21	1	2.56	5.82	4.33	2.56	4.08	3.77	2.56	4.31	2.33
146	25	1	1.7	5.91	3.94	2.83	4.31	4.12	2.56	3.62	2.26
147	23	1	2.56	5.45	3.58	2.53	5.77	2.68	3.22	4.08	2.56
148	22	2	1.7	4.83	5.37	2.17	2.89	3.7	3.63	3.56	3.02
149	24	2	1.7	3.58	5.22	3.77	4.51	3.86	3.08	4.63	3.22
150	19	2	2.26	5.95	3.77	3.11	5.68	3.78	2.9	6.37	2.86
151	20	1	2.56	5.73	4.66	2.86	4.29	3.96	3.24	3.38	2.5
152	18	1	2.26	3.69	4.47	2.79	2.82	2.24	4.56	3.53	1.62
153	21	1	2.83	5.66	4.25	2.4	5.06	2.62	3.58	6.32	3.5
154	25	1	2.26	5.91	4.33	3.04	5.4	4.39	3.83	3.46	2.37
155	24	1	2.26	4.95	4.56	3.5	5.85	3.73	2.08	5.49	2.57
156	19	2	2.56	4.47	3.94	3.12	2.61	3.34	3.21	5.06	2.63
157	18	1	2	4.31	4.47	3.38	4.51	2.3	2.71	5.38	1.36
158	20	1	2.83	5.56	5.01	2.7	5.18	3.3	4.67	5.62	3.48
159	21	1	2.56	4.87	4.25	2.1	2.32	2.62	3.86	5.39	2.48
160	22	2	2	4.95	4.88	3.69	2.27	4.52	3.91	3.16	3.9
161	25	2	2	4.18	4.56	3.46	2.58	3.8	4.32	3.53	3.71
162	19	2	2	4.02	5.22	2.5	2.75	2.26	4.89	4.49	2.44
163	18	2	2	5.2	5.57	3.14	4	4.06	2.09	4.29	2.62
164	20	2	1.79	3.96	3.79	2.29	4.14	3.48	3.37	3.77	2.42
165	23	1	2.26	5.34	4.66	3.34	5.02	4.99	3.43	5.47	2.1
166	22	2	1.7	4.31	4.66	2.12	2.67	4.51	4.09	4.66	2.25
167	21	2	2.26	5.34	3.44	2.38	6.27	4.04	2.05	3.85	3.1
168	21	2	1.79	3.96	3.79	2.29	4.14	3.48	3.37	3.77	2.42
169	19	1	1.7	5.91	3.94	3.34	5.02	4.99	3.43	5.47	2.1
170	18	1	2.56	5.45	3.58	2.12	2.67	4.51	4.09	4.66	2.25
171	18	2	1.7	4.83	5.37	2.38	6.27	4.04	2.05	3.85	3.1
172	22	2	1.7	3.58	5.22	2	2.99	2.81	2.32	4.89	3.28
173	19	2	2.26	5.95	3.77	3.8	3.16	4.38	2.09	6.89	2.37
174	23	1	2.56	5.73	4.66	3.69	2.27	4.52	3.91	3.16	3.9
175	18	2	1.56	5	5.12	3.46	2.58	3.8	4.32	3.53	3.71
176	21	2	2.26	3.77	5.12	2.5	2.75	2.26	4.89	4.49	2.44
177	25	1	2.26	4.95	4.82	3.14	4	4.06	2.09	4.29	2.62
178	22	2	2.33	4.87	3.44	3.79	5.39	2	3.35	4.03	1.77
179	18	1	2.26	4.83	2.83	2.44	4.41	2.11	3.95	5.4	1.17
180	19	2	2.83	4.56	4.53	3.32	4.79	4.37	4.34	5.63	2.45
181	19	1	1.7	5.91	3.94	3.69	2.27	4.52	3.91	3.16	3.9
182	18	1	2.56	5.45	3.58	3.46	2.58	3.8	4.32	3.53	3.71
183	18	2	1.7	4.83	5.37	2.5	2.75	2.26	4.89	4.49	2.44
184	22	2	1.7	3.58	5.22	3.14	4	4.06	2.09	4.29	2.62
185	19	2	2.26	5.95	3.77	3.38	4.51	2.3	2.71	5.38	1.36
186	23	1	2.56	5.73	4.66	2.7	5.18	3.3	4.67	5.62	3.48
187	24	1	2.26	3.69	4.47	2.1	2.32	2.62	3.86	5.39	2.48
188	21	1	2.83	5.66	4.25	2.5	4.65	4.03	2.35	3.13	3.19
189	24	1	2.26	5.91	4.33	3.12	2.07	3.39	4.09	3.05	2.43
190	22	1	2.26	4.95	4.56	2.63	6.52	2.29	2.1	5.1	2.9
191	18	2	2.56	4.47	3.94	2.4	5.78	3.47	2.17	6.51	2.35
192	19	1	2	4.31	4.47	3.85	5.45	3.38	4.14	6.38	1.7
193	20	1	2.83	5.56	5.01	2.62	5.4	2.61	4.71	6.36	3.73
194	22	1	2.56	4.87	4.25	3.24	6.86	4.46	3.91	6.23	3.55
195	23	2	2	4.95	4.88	2.88	4.38	3.96	3.62	5.17	3.27
196	18	1	2	4.31	4.47	3.19	5.85	2.25	2.67	6.04	1.78
197	20	1	2.83	5.56	5.01	3.73	5.99	3.16	3.87	5.24	2.02
198	21	1	2.56	4.87	4.25	3.59	4.29	3.98	3.2	5.3	3.76
199	22	2	2	4.95	4.88	2.4	5.78	3.47	2.17	6.51	2.35
200	25	2	2	4.18	4.56	3.85	5.45	3.38	4.14	6.38	1.7
